# Supplementary material for: Fruit weight is controlled by Cell Size Regulator encoding a novel protein that is expressed in maturing tomato fruits
Source: PubMed Central journal article supplement (PMC5560543; doi:10.1371/journal.pgen.1006930), 2017-08-17

**S3A Fig****Cluster 1**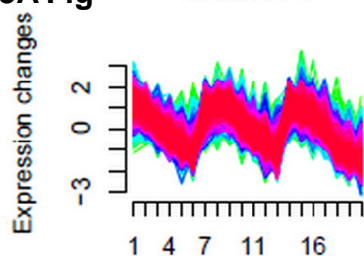**Cluster 2**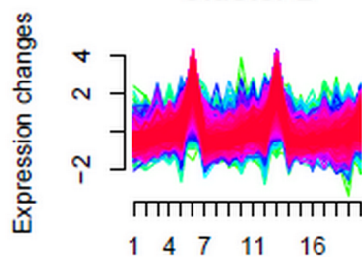**Cluster 3**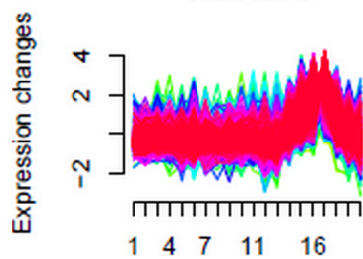**Cluster 4**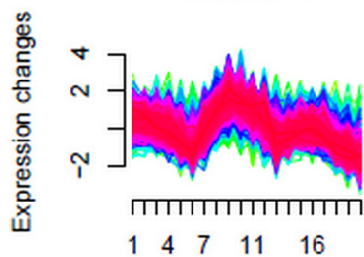**Cluster 5**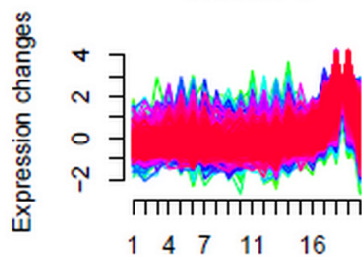**Cluster 6**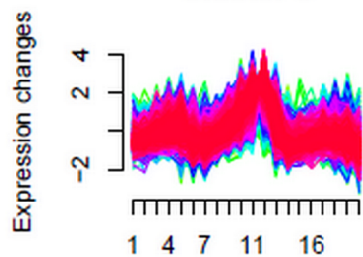**Cluster 7**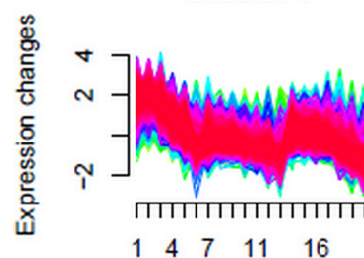**Cluster 8**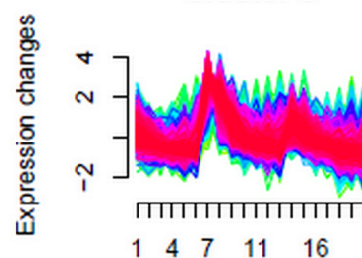**Cluster 9**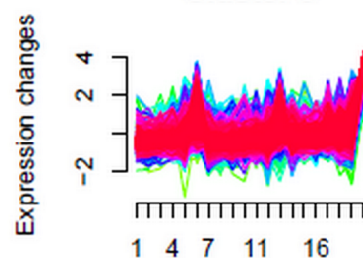**Cluster 10**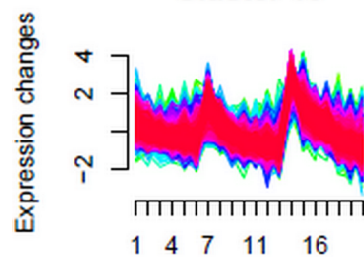**CSR-D Cluster 11**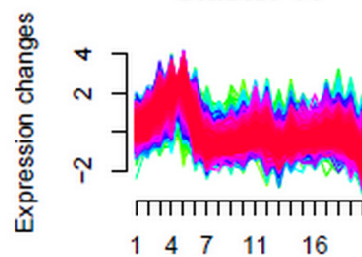**Cluster 12**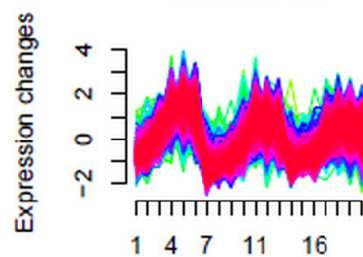

**D**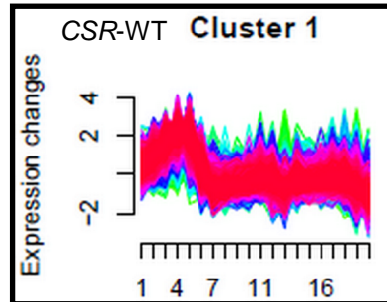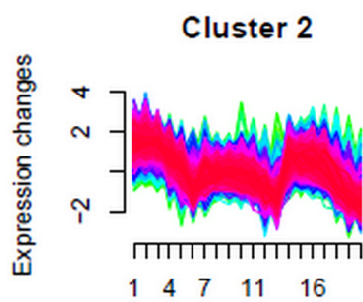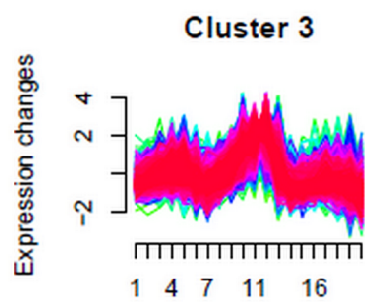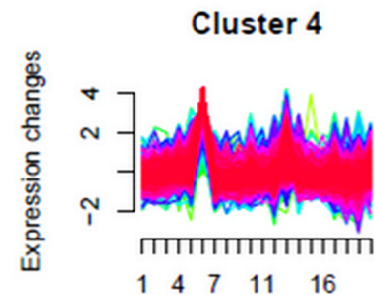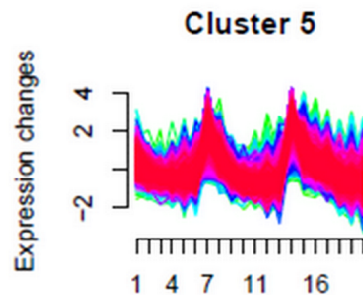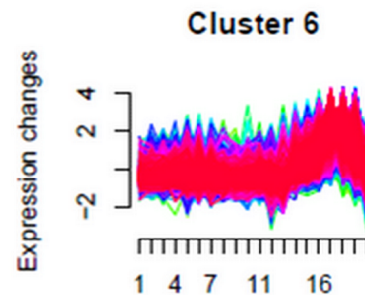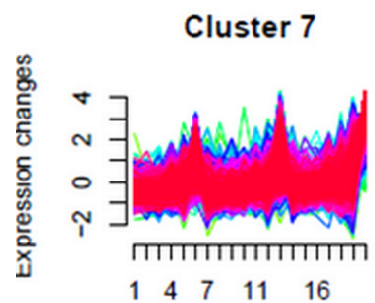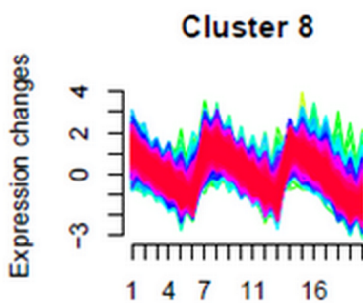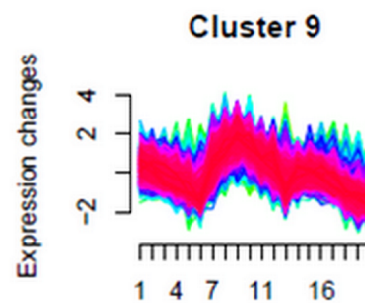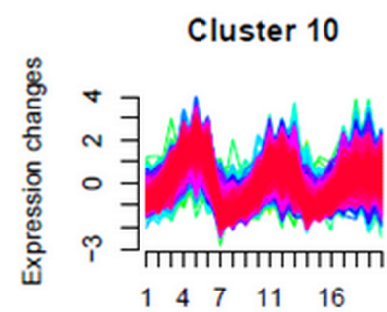

Supplement: pgen.1006930.s003.pdf [file pgen.1006930.s003.pdf]
