# Supplementary material for: Fruit weight is controlled by Cell Size Regulator encoding a novel protein that is expressed in maturing tomato fruits
Source: PubMed Central journal article supplement (PMC5560543; doi:10.1371/journal.pgen.1006930), 2017-08-17

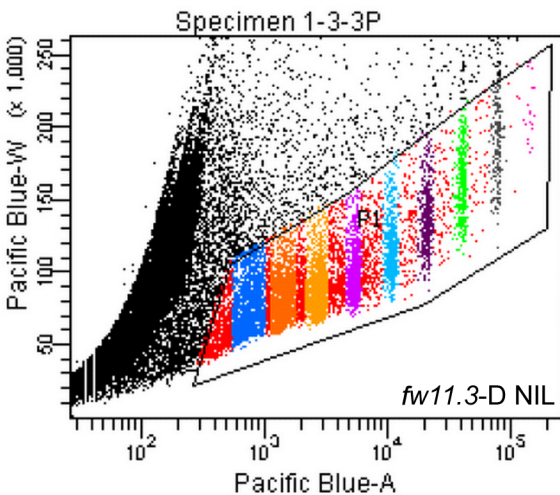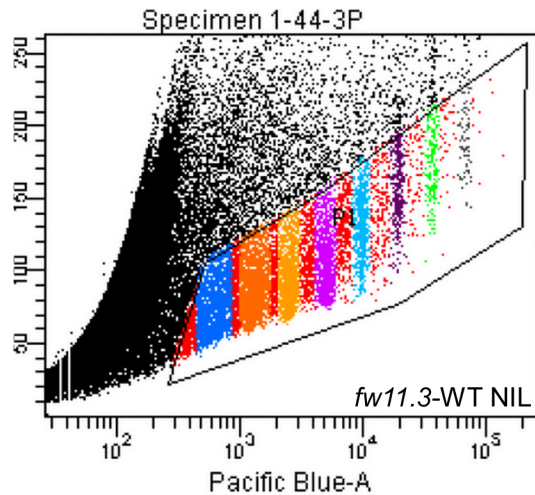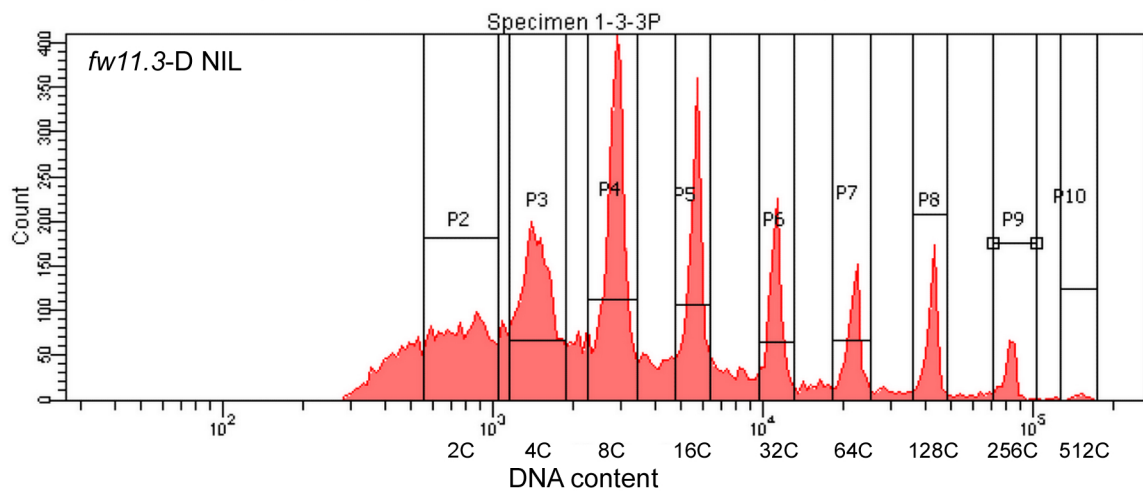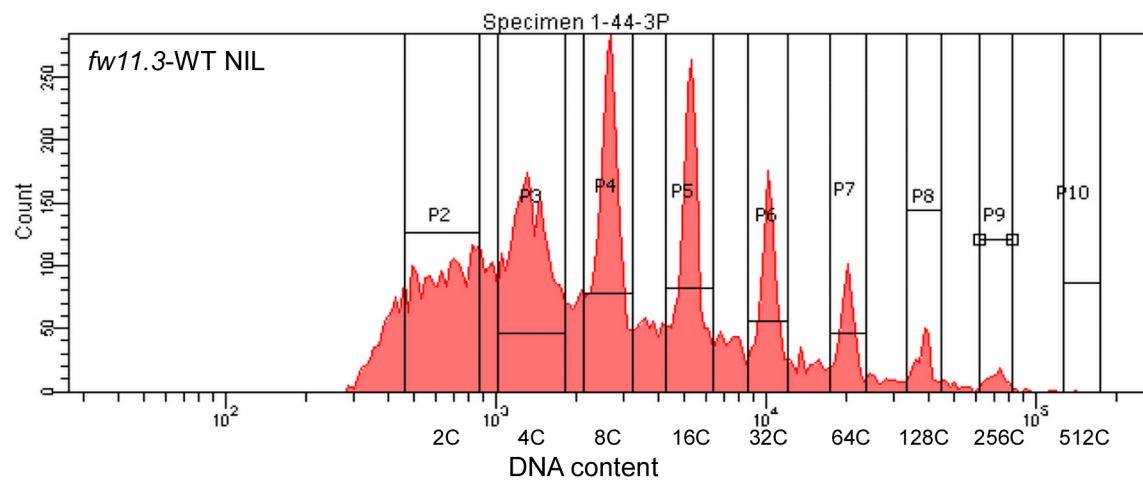

Supplement: pgen.1006930.s001.pdf [file pgen.1006930.s001.pdf]
