# Supplementary material for: Fruit weight is controlled by Cell Size Regulator encoding a novel protein that is expressed in maturing tomato fruits
Source: PubMed Central journal article supplement (PMC5560543; doi:10.1371/journal.pgen.1006930), 2017-08-17

# S2A Fig. Expression of CSR in developing fruit tissues

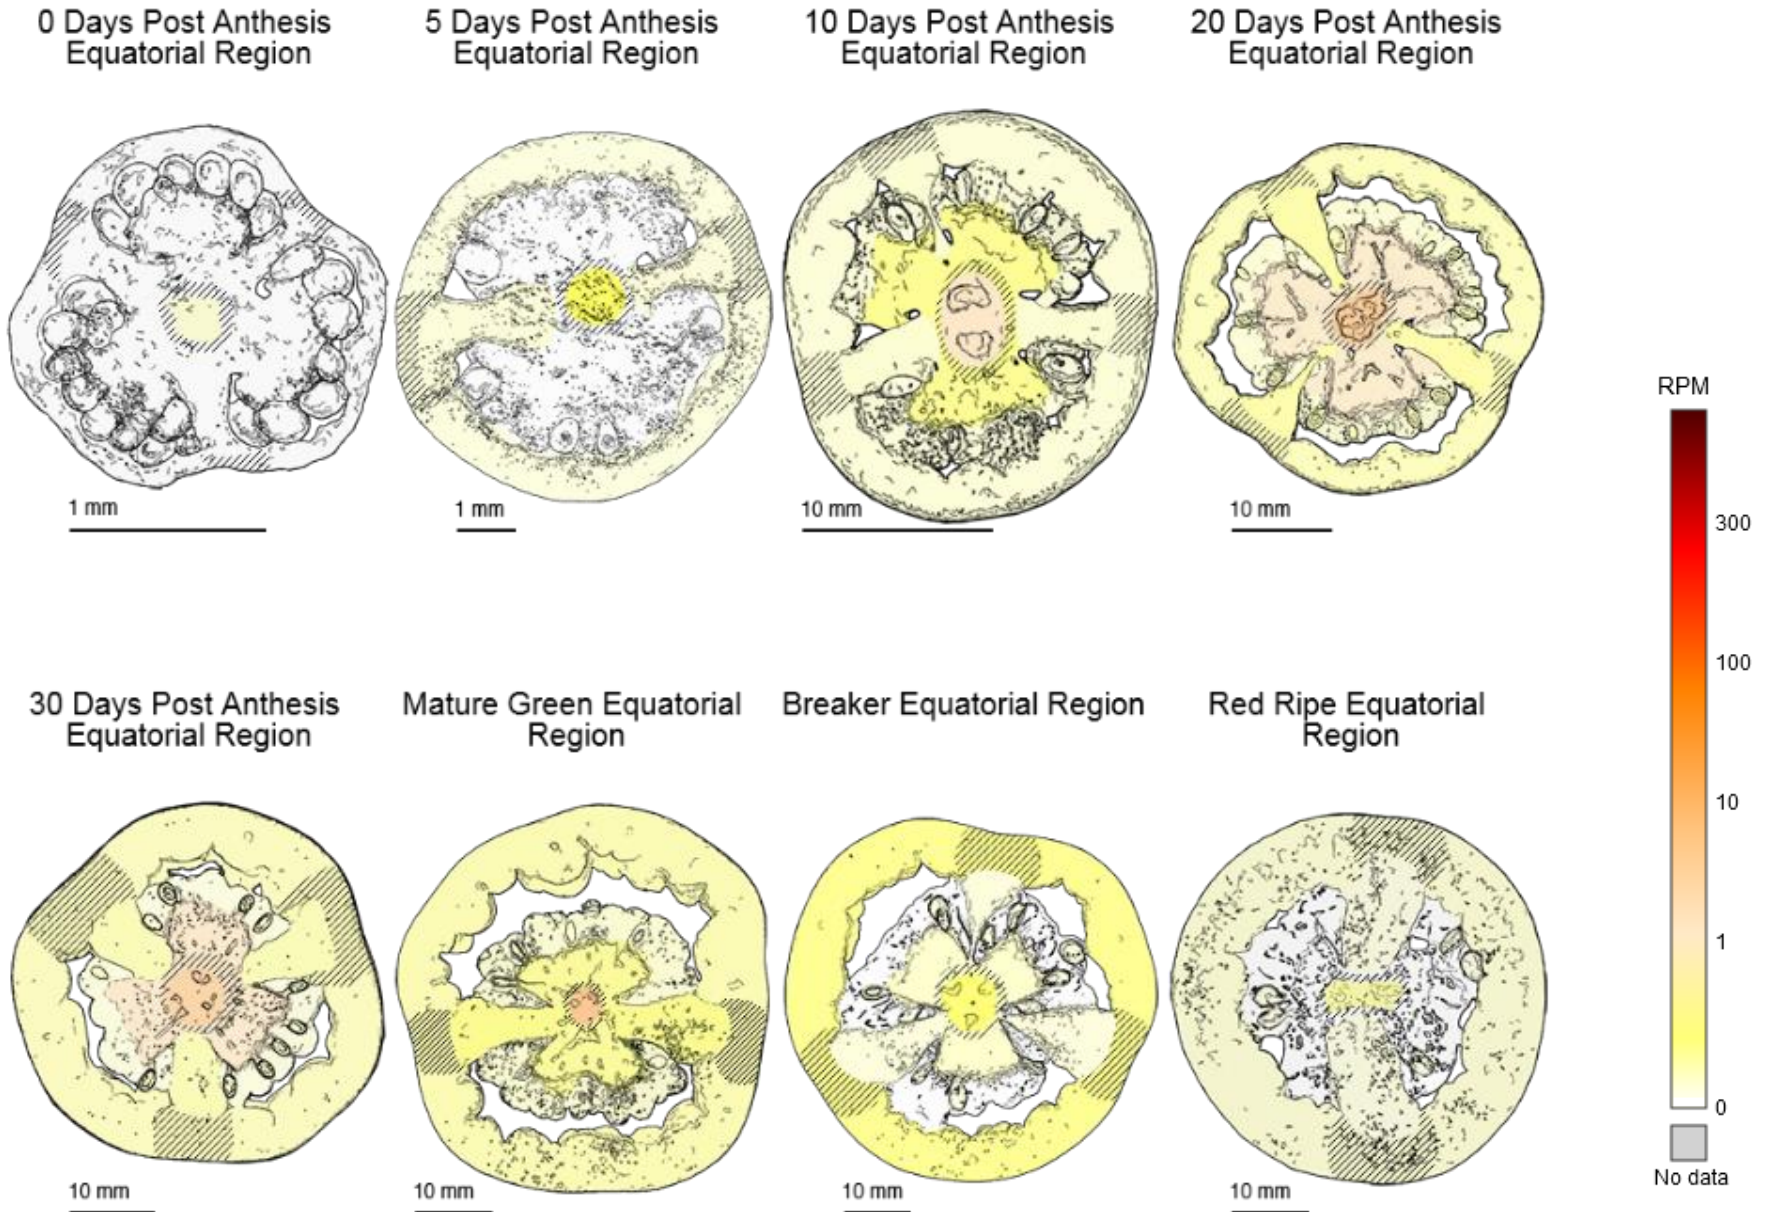

# S2B Figure. Expression of CSR in developing pericarp tissues

5 Days Post Anthesis  
Equatorial Region

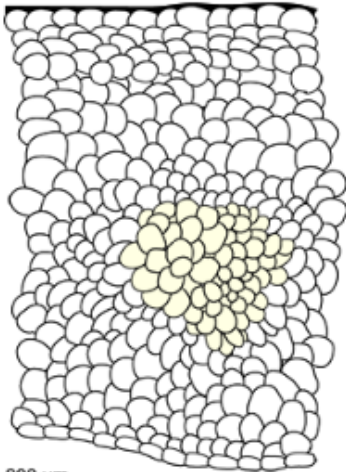

10 Days Post Anthesis  
Equatorial Region

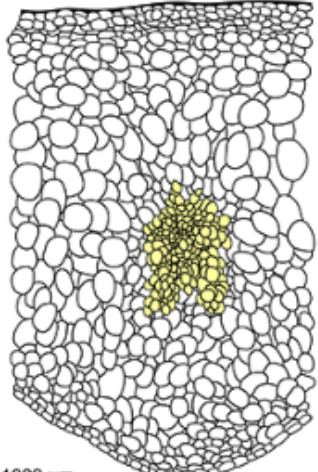

20 Days Post Anthesis  
Equatorial Region

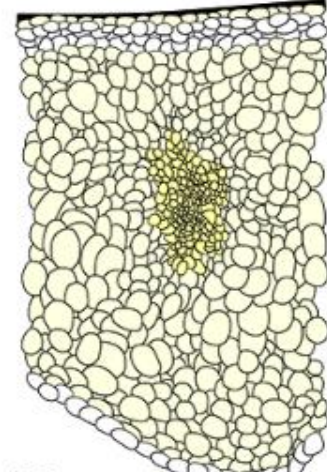

Mature Green  
Equatorial Region

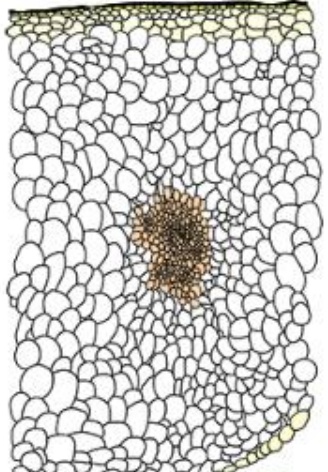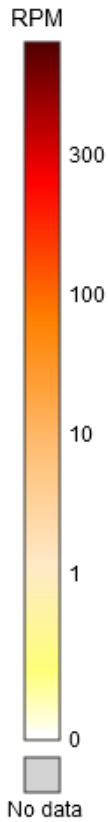

Supplement: pgen.1006930.s002.pdf [file pgen.1006930.s002.pdf]
