# Supplementary material for: Fruit weight is controlled by Cell Size Regulator encoding a novel protein that is expressed in maturing tomato fruits
Source: PLoS Genet. 2017 Aug 17;13(8):e1006930. doi: 10.1371/journal.pgen.1006930 (PMC5560543; doi:10.1371/journal.pgen.1006930)
Supplement: S3 Table — (XLSX) [file pgen.1006930.s007.xlsx]

## Sheet: Sheet1
S3 Table. Phenotypic characterizations of the fw11.3 NILs
Measurements			Trait value
			Rep1				Rep2
			fw11.3-D	fw11.3-WT	P-value		fw11.3-D	fw11.3-WT	P-value
Ovary			14S81 Field				14S81 Field
	Ovary area (mm2)		1.56±0.15	1.64±0.19	0.172148		1.72±0.46	1.69±0.23	0.840449
Fruit yield per plant
	Number of fruits		13S77 Field				13S85 Field
		Red fruits	81.54±19.37	66.33±6.54	0.0175382		71.08±18.79	73.92±17.4	0.705239
		Green fruits	212.62±40.96	280.42±52.32	0.00142458		222.42±37.12	287.75±39.35	0.000384812
		Total fruits	294.15±54.83	346.75±55.28	0.0256066		293.5±36.23	361.67±38.44	0.000191195
	Total fruit weight per plant (kg)
		Red fruits	6.33±1.33	4.3±0.47	0.000109462		5.52±1.57	4.87±1.24	0.274379
		Green fruits	8.68±1.57	9.26±1.73	0.389935		9.3±2.02	9.45±1.42	0.830142
		Total yield	15.01±2.6	13.55±2	0.132177		14.82±2.59	14.32±1.8	0.593611
Fruit ripening			13S77 Field				13S85 Field
	Anthesis to orange (days)		45.88±1.19	46.25±1.14	0.478985		45.66±0.9	45.22±1.08	0.30432
	Orange to red (days)		6.02±0.39	6.3±0.58	0.227655		6.49±0.52	6.00±0.83	0.105982
	Anthesis to red (days)		51.91±1.32	52.55±1.46	0.306303		52.15±0.85	51.22±1.64	0.103432
Fruit quality			14S82 Field				14S81 Field
	Fruit Brixa (%)		4.86±0.13	5.08±0.22	0.0102846		5.1±0.43	4.97±0.26	0.448767
Seed attributes			11S67 Fieldb				13S18 Greenhouse
	Seeds weight per fruit (g)		0.24±0.04	0.22±0.02	0.237304		0.29± 0.06	0.31 ± 0.08	0.423685
	Ave seed weight (mg)		2.97±0.12	2.93±0.17	0.533063		3.79 ± 0.22	3.77 ± 0.15	0.989593
	Seeds number per fruit		81.4±11.32	76.83±6.57	0.298634		82.58 ± 19.1	76.65 ± 13.65	0.362416
Number of flowersc			14S140, 14S149 Greenhouse (20-20-20 + Ca)				14S140, 14S149 Greenhouse (14-7-14)
	Total inflorescence		17±2.83	18.56±3.05	0.278131		16±4.34	18±2.61	0.355756
	Flowers per inflorescence		3.95±0.59	4.26±0.38	0.193038		4.44±0.58	4.31±0.32	0.63223
	Main stem inflorescence		4.78±0.83	4.67±0.71	0.7643		4.17±0.98	4.83±0.41	0.156054
	Main stem flowers per inflorescence		4.95±0.59	5.9±0.68	0.00622106		5.73±0.49	5.6±0.33	0.614792
Plant architectured
	Plant height (cm)		13S132 Greenhouse				14S81 Fieldb
		1st measurement	53.2±4.3	61.22±6.92	0.00690703		61.54±4.5	63.71±5.44	0.2603
		2nd measurement	80.1±9.65	89±11.52	0.0845605		62.75±4.27	65.29±6.64	0.1177
		Increase	24.4±7.48	26.8±6.08	0.432981		NAe	NAe	NAe
	Total side shoot length (cm)
		1st measurement	44.85±19.87	50.67±14.47	0.480233		226.42±51.92	229.31±61.22	0.0878
		2nd measurement	176.15±31.36	232.39±57.44	0.015556		257.64±48.84	270.2±64.15	0.0501
		Increase	131.55±30.72	178.86±38.3	0.00587486		31.5±12.58	53.6±19.46	0.0386
	Number of side shoots
		1st measurement	9.3±0.82	10.44±1.24	0.0281695		13.33±0.98	12.85±1.41	0.9211
		2nd measurement	13.2±0.92	13.78±0.83	0.170989		14.73±1.42	14.7±1.06	0.4146
		Increase	3.5±0.97	3.36±0.67	0.710611		1.36±1.21	1.7±0.48	0.6636
	Number of nodes
		1st measurement	11.7±0.67	12.11±0.6	0.180833		16.25±0.75	16.31±1.03	0.8808
		2nd measurement	14.5±0.85	15.22±0.83	0.0793067		17±0.63	17.2±1.48	0.4891
		Increase	2.6±0.7	3.00±0.77	0.231017		0.64±0.5	0.7±0.82	0.8966
Leaf attributes
	Weight (g)		13S132 Greenhouse				14S81 Fieldb
		8th leaf	31.35±6.74	31.13±5.82	0.932756		18.38±4.81	15.36±3.15	0.0795
		9th leaf	26.69±4.78	32.75±7.39	0.03343		23.52±5.04	22.33±5.21	0.8585
		10th leaf	23.81±4.71	27.57±4.30	0.0580369		25.83±6.38	26.25±9.16	0.9042
	Petiole (cm)
		8th leaf	5.64±0.92	5.63±0.79	0.993266		4.09±1.54	3.88±0.65	0.8342
		9th leaf	5.25±0.88	5.68±0.98	0.282952		3.67±1.16	3.42±0.6	0.8909
		10th leaf	4.61±0.76	4.90±1.12	0.479618		3.87±0.77	3.6±0.51	0.4188
	Rachis (cm)
		8th leaf	31.81±1.89	31.67±1.99	0.862404		15.22±2.42	14.98±1.33	0.2142
		9th leaf	31.61±1.91	33.61±2.28	0.0374039		18.78±3.37	18.64±2.26	0.646
		10th leaf	32.2±2.57	34.56±1.62	0.0146566		21.55±3.62	21.02±1.92	0.7205
	Petiolule (cm)
		8th leaf	2.01±0.6	1.95±0.41	0.785145		1.64±0.58	1.78±0.44	0.4622
		9th leaf	1.76±0.32	1.79±0.48	0.877098		1.38±0.64	1.35±0.41	0.6509
		10th leaf	1.89±0.65	2.00±0.59	0.654002		1.16±0.55	1.23±0.23	0.3959
	Number of primary lateral leaflet
		8th leaf	9.0±0.0	9.0±0.0	NA		7.11±0.33	7.2±0.63	1
		9th leaf	9.0±0.0	9.0±0.0	NA		8±1	8.2±1.03	0.6078
		10th leaf	9.0±0.0	9.0±0.0	NA		8.09±1.04	8.3±0.95	0.5353
	Number of intercalary leaflet
		8th leaf	11.36±3.35	10.67±3.17	0.613898		2.67±1.41	2.2±1.55	0.1931
		9th leaf	13.91±3.05	14.64±3.04	0.581623		6.33±2.5	6.2±2.2	0.8285
		10th leaf	12.82±3.76	15.42±3.23	0.0893837		11.09±2.95	9.9±2.88	0.338
	Number of secondary leaflet
		8th leaf	10.82±1.54	11.67±2.77	0.380895		4.33±2.45	4.2±1.4	0.0536
		9th leaf	10.36±3.59	13.09±3.59	0.0898248		11.33±5.17	12±5.48	0.9726
		10th leaf	8.27±3.04	11.08±2.15	0.0174871		10.91±2.74	10.6±3.41	0.8188
	Number of tertiary leaflet
		8th leaf	0.36±0.67	0.92±1	0.137525		0±0	0±0	NA
		9th leaf	0.55±0.69	2.45±1.86	0.00462441		1.56±2.92	1.5±2.27	0.8398
		10th leaf	0.36±0.67	1.67±1.83	0.036675		0.73±1.19	0.6±1.07	0.7763
	Terminal leaflet Length (cm)
		8th leaf	16.05±1.26	15.98±2.26	0.93477		8.03±0.5	7.28±0.95	0.0221
		9th leaf	15.32±1.44	15.81±2.17	0.544272		8.28±0.58	7.75±0.85	0.3523
		10th leaf	15.76±1.49	14.99±1.10	0.195154		9.39±1.24	8.9±1.04	0.3846
	Terminal leaflet Width (cm)
		8th leaf	6.58±0.89	6.87±0.94	0.464329		3.81±0.31	3.4±0.26	0.0291
		9th leaf	6.41±0.59	6.74±0.76	0.280419		4.75±0.49	4.24±0.59	0.1032
		10th leaf	6.59±0.91	6.65±0.42	0.836482		5.23±0.74	5.28±1.13	0.9874
Source-sink relationship			14S82 Field
	Thinned (g)		140.16±11.18	115.52±8.86	4.11782e-05
	Control (g)		110.01±8.1	86.45±10.38	1.29361e-05
	Fruit weight increase (g)		30.1467	29.073	0.814488
	percentage of increase (%)		0.27	0.34	0.189152
Data are given as mean±sd
The p-value are in most cases from the Student's t-test, except for plant architecture and leaf structure analysis, in which case the p-value was derived from the F-test of the ANOVA analyses.
a A third replicate showed no significant difference between fw11.3 NILs for BRIX.
b NILs in the Howard German background. All the other families without a subscript are NILs in the Rio Grande background.
c These traits were evaluated during the early growth stages and not when the fruit were ripe. Also different fertilizers were used for the two replicates: 20-20-20 with Calcium for replicate 1, and 14-7-14 for replicate 2.
d Plant architecture greenhouse measurements were conducted 55 and 66 days after sowing; field measurements were conducted at 87 and 108 days after sowing, or 42 and 63 days after transplant.
e Interaction between genotype and block was observed in plant height increase, and genotype main effect cannot be compared.
