# Supplementary material for: Fruit weight is controlled by Cell Size Regulator encoding a novel protein that is expressed in maturing tomato fruits
Source: PLoS Genet. 2017 Aug 17;13(8):e1006930. doi: 10.1371/journal.pgen.1006930 (PMC5560543; doi:10.1371/journal.pgen.1006930)
Supplement: S7 Table — (XLSX) [file pgen.1006930.s011.xlsx]

## Sheet: Sheet1
S7 Table. Association mapping core collection and genotypes for fw11.3 region
CC Code	Name	Species	FW2007 (g)	FW2008 (g)	FW2010 (g)	HP61	HP32	HP31
CC2	M-82	S. lycopersicum	65.0926	60.0333	64.3667	1	1	1
CC3	Microtom	S. lycopersicum var cerasiforme	7.13333	6.62	3.7	3	3	1
CC4	Moneymaker	S. lycopersicum	80.9286	118.067	77.1861	1	1	1
CC5	Ferum	S. lycopersicum	60.8214	143.867	72.6	1	1	1
CC6	Heinz 1706	S. lycopersicum	45.25	43	51.2333	1	1	1
CC7	LA0147	S. lycopersicum	69	164.467	92.5	1	1	1
CC8	Orange Cocktail	S. lycopersicum	59.9048	61.4333	64.8889	1	1	1
CC9	VIR1011	S. lycopersicum	22.9519	23.5667	19.5333	1	1	1
CC10	LA0409	S. lycopersicum	89.1032	144.267	111.209	1	3	1
CC12	LA1464	S. lycopersicum var cerasiforme	2.92222	3.5	2.63333	1	3	1
CC13	Criollo	S. lycopersicum var cerasiforme	19.6444	32.5	31.1167	2	2	1
CC14	LA2137	S. lycopersicum var cerasiforme	NA	NA	5.37222	3	3	1
CC15	Phyra	S. lycopersicum var cerasiforme	5.13333	5.3	41.4	1	3	3
CC16	LA2675	S. lycopersicum var cerasiforme	4.46667	5.43333	2.91667	3	3	1
CC17	Tiny tim	S. lycopersicum var cerasiforme	10.5667	11.5167	7.85	1	1	1
CC18	LA1589	S. pimpinellifolium	1.9	2.83333	1.05	3	3	1
CC19	Wva700	S. pimpinellifolium	3.6	4.83333	2.68333	1	3	1
CC20	LA1602	S. pimpinellifolium	NA	NA	0.816667	3	3	1
CC21	LA1840	S. chmielewskii	NA	NA	1.11667	1	3	2
CC22	PI247087	S. habrochaites	NA	NA	2.25833	1	3	3
CC23	LA0716	S. pennellii	NA	NA	NA	1	3	3
CC24	LA1401	S. galapagense	NA	NA	NA	1	3	3
CC25	Clémentine	S. lycopersicum var cerasiforme	4.73333	6	5.32222	1	3	1
CC26	San Marzano	S. lycopersicum	54.3333	85.6	64.35	1	1	1
CC27	Plovdiv XXIVa	S. lycopersicum	34.8333	48.25	34.3167	1	1	1
CC28	Wva106	S. pimpinellifolium	7.66667	11.6333	5.26667	3	3	1
CC29	LA1478	S. pimpinellifolium	1.96667	2.06667	0.452564	3	3	3
CC30	VIR108	S. pimpinellifolium	1.23333	2.7	1.16667	3	3	1
CC31	VIR2909	S. lycopersicum var cerasiforme	4.8	5.36667	4.5	1	3	1
CC32	VIR2921	S. pimpinellifolium	1.7	2.53333	1.16667	3	3	1
CC33	VIR4156	S. pimpinellifolium	1.4	1.85	1.53333	3	3	1
CC34	VIR350 or VIR35	S. lycopersicum var cerasiforme	NA	NA	34.6471	1	1	1
CC35	VIR1565	S. lycopersicum var cerasiforme	12.6333	7.66667	4.13333	3	3	1
CC36	VIR2759	S. lycopersicum var cerasiforme	29.5667	40.0333	27.15	1	1	1
CC37	VIR933	S. lycopersicum var cerasiforme	32.6667	34.5333	22.1315	1	3	1
CC38	VIR2257	S. lycopersicum var cerasiforme	19.6667	27.35	11.5333	1	3	1
CC39	VIR347	S. lycopersicum var cerasiforme	29.1	31.8	25.2333	1	3	1
CC40	VIR795	S. lycopersicum var cerasiforme	19.6333	24.5056	13.8	1	3	1
CC41	VIR884	S. lycopersicum var cerasiforme	22.5	26.4	16.5	1	3	1
CC42	VIR739	S. lycopersicum var cerasiforme	32.05	76.1333	46.2204	3	3	1
CC43	LA1204	S. lycopersicum var cerasiforme	12.0333	18.05	10.1333	1	3	1
CC44	LA1231	S. lycopersicum var cerasiforme	4.2	5.7	1.96667	2	3	1
CC45	LA1307	S. lycopersicum var cerasiforme	12.6833	16.7333	9.9	3	3	1
CC46	LA1388	S. lycopersicum var cerasiforme	13.1	20.6	10.25	1	3	1
CC47	LA1420	S. lycopersicum var cerasiforme	31.3167	46.7667	23.0333	1	3	1
CC48	LA1456	S. lycopersicum var cerasiforme	4.18571	5.66667	3.16667	3	3	1
CC49	LA1461	S. lycopersicum var cerasiforme	3.37778	4.41667	2.91667	1	3	1
CC50	LA1482	S. lycopersicum var cerasiforme	7.94444	11.3	6.28333	1	3	1
CC51	LA0172	S. lycopersicum var cerasiforme	33.2524	42.0333	21.4833	3	3	1
CC52	LA0466	S. lycopersicum	137.444	280.267	160.178	1	1	1
CC53	LA0473	S. lycopersicum	35.1333	64.5667	34.6333	1	1	1
CC54	LA1543	S. lycopersicum var cerasiforme	8.89259	13.5667	8.33333	1	3	1
CC55	LA2095	S. lycopersicum var cerasiforme	27.3	26.4333	13.05	1	3	1
CC56	LA2131	S. lycopersicum var cerasiforme	33.6556	46.9833	28.6296	1	1	1
CC58	LA2308	S. lycopersicum var cerasiforme	26.3222	29	18.6667	1	3	1
CC59	LA2402	S. lycopersicum var cerasiforme	6.13333	7.33333	5.27083	1	3	1
CC60	LA2619	S. lycopersicum var cerasiforme	10.7667	16.7	7.53333	1	3	1
CC61	LA2688	S. lycopersicum var cerasiforme	3.56667	5.03333	2.525	3	3	1
CC62	LA0400	S. pimpinellifolium	1.83333	2.3	0.966667	2	3	3
CC63	LA0411	S. pimpinellifolium	2.53333	3.66667	2.1	1	3	1
CC64	LA1371	S. pimpinellifolium	2.03333	2.5	0.783333	3	3	1
CC65	LA1547	S. pimpinellifolium	2.7	4.06667	NA	2	3	1
CC66	LA1689	S. pimpinellifolium	1.83333	2.5	0.95	1	3	1
CC67	tomate Richter's	S. lycopersicum var cerasiforme	3.43333	4.13333	3.15	1	3	1
CC68	CGN18399	S. lycopersicum var cerasiforme	5.26667	7.56667	3.96667	1	3	1
CC69	L. pimpinellifolium atypique, site 10 (F300045)	S. lycopersicum var cerasiforme	10.1	10.6667	4.86667	2	2	1
CC70	Atom	S. lycopersicum var cerasiforme	25.7	27.2167	26.6667	1	1	1
CC71	PI365923	S. lycopersicum var cerasiforme	13.1333	17.4333	11.2667	3	3	1
CC72	PI129088	S. lycopersicum var cerasiforme	18.0917	6.5	3.83333	3	3	1
CC73	L285	S. lycopersicum var cerasiforme	16.0125	15.6333	8.8	1	1	1
CC74	Yellow Pear	S. lycopersicum var cerasiforme	NA	NA	10.1	1	3	1
CC75	Cherry Gold	S. lycopersicum var cerasiforme	7.98333	7.3	6.31111	3	3	3
CC76	Cherry VFNT	S. lycopersicum var cerasiforme	19.125	24	8.03889	1	1	1
CC77	Droplet	S. lycopersicum	15.2333	18.1167	20.3167	1	1	1
CC78	Monplaisir	S. lycopersicum var cerasiforme	22.3	22.6	12.5833	3	3	1
CC79	Farthest North	S. lycopersicum var cerasiforme	8.7	9.05	10.7	1	1	1
CC80	Minibel	S. lycopersicum var cerasiforme	17.8	21.0333	13.6778	3	3	1
CC81	Ohmiya Suncherry	S. lycopersicum var cerasiforme	14.5333	13.0333	9.91667	3	3	1
CC82	Celsior	S. lycopersicum var cerasiforme	10	14.1667	7.43333	1	3	1
CC83	Marpha n°2	S. lycopersicum var cerasiforme	7.53333	9.46667	4.96667	1	3	1
CC84	Cerise Ildi	S. lycopersicum var cerasiforme	6.93333	8.3	NA	1	3	1
CC85	Cerise Orange d'Uzès	S. lycopersicum var cerasiforme	10.7333	16.8333	11.65	1	3	1
CC86	Cerise du sud ouest n° 2	S. lycopersicum var cerasiforme	8.86667	11.5	6.3	1	3	1
CC87	cerise rose	S. lycopersicum var cerasiforme	9.33333	11.5	12.1833	1	3	1
CC88	Cisterno	S. lycopersicum var cerasiforme	19.4667	23.5667	14.45	1	3	1
CC89	Pyriforme	S. lycopersicum var cerasiforme	9.6	10.4	5.43333	1	2	1
CC90	8 bis	S. lycopersicum var cerasiforme	18.9667	22.2667	13.65	1	3	1
CC91	Costa Rica	S. lycopersicum var cerasiforme	14.9	16.7667	8.63333	1	3	1
CC92	Poire jaune	S. lycopersicum var cerasiforme	16.0417	17.7667	11.4	1	3	1
CC93	Edkawy	S. lycopersicum	172.908	276.067	163.126	1	1	1
CC94	Cra 66	S. lycopersicum	36.6667	44.1667	35.7167	1	1	1
CC95	Stupicke Polni Rane	S. lycopersicum	55.1111	67.2333	64.5461	1	1	1
CC96	Muchamiel	S. lycopersicum	127.944	217.867	130.05	1	1	1
